# Supplementary material for: MFN1 and MFN2 Are Dispensable for Sperm Development and Functions in Mice
Source: MDPI journal article supplement (doi:10.3390/ijms222413507), 2021-12-16
Supplement: s1 [file s1]

**Table S1.** Transmission efficiency of mutant alleles by *Prm1-Cre* from Jackson Lab.

| Floxed alleles                      | NO. of males | NO. of litters | NO. of pups | f/+ pups | Del/+ pups | Transmission Del/+ allele |
|-------------------------------------|--------------|----------------|-------------|----------|------------|---------------------------|
| <i>Mfn1<sup>flf</sup>; Prm1-Cre</i> | 2            | 4              | 35          | 8        | 27         | 77%                       |
| <i>Mfn2<sup>flf</sup>; Prm1-Cre</i> | 3            | 6              | 50          | 24       | 26         | 52%                       |

**Table S2.** Primers used in genotyping.

| Gene name                            | Forward primers (5' to 3')   | Reverse primers (5' to 3')   | Size of Amplicon                   |
|--------------------------------------|------------------------------|------------------------------|------------------------------------|
| <i>Prm1-Cre</i> (Jackson Laboratory) | GCGGTCTGGCAGTA<br>AAAACATATC | GTGAAACAGCATTGCT<br>GTCACCTT | 100bp                              |
| <i>Prm1-Cre</i> (RIKEN BRC)          | GTTTCACTGGTTATG<br>CGGCGG    | TTCCAGGGCGCGAGTT<br>GATAG    | 450bp                              |
| <i>Mfn1-floxed</i>                   | TTGGTAATCTTTAGC<br>GGTGCTC   | AGCAGTTGGTTGTGTG<br>ACCA     | Homozygous:450bp<br>Wildtype:350bp |
| <i>Mfn1-delete</i>                   | TTGGTAATCTTTAGC<br>GGTGCTC   | TTAAAGACACGGCTAA<br>TGGCAG   | Cre excised:325bp                  |
| <i>Mfn2-floxed</i>                   | GAAGTAGGCAGTCT<br>CCATCG     | AACATCGCTCAGCCTG<br>AACC     | Homozygous:180bp<br>Wildtype:145bp |
| <i>Mfn2-delete</i>                   | GAAGTAGGCAGTCT<br>CCATCG     | ACATCACCTGAAGCC<br>TGGTTT    | Cre excised:350bp                  |

**Table S3.** Primers used in qPCR.

| Gene name    | Forward primers (5' to 3') | Reverse primers (5' to 3') |
|--------------|----------------------------|----------------------------|
| <i>Mfn1</i>  | AGCGGGATTGGTCACACAAC       | CCTTCGGTCATAAGGTAGGCTT     |
| <i>Mfn2</i>  | GTGGGCTGGAGACTCATCG        | CTCACTGGCGTATTCCACAA       |
| <i>Gapdh</i> | AGGTCGGTGTGAACGGATTTG      | TGTAGACCATGTAGTTGAGGTCA    |

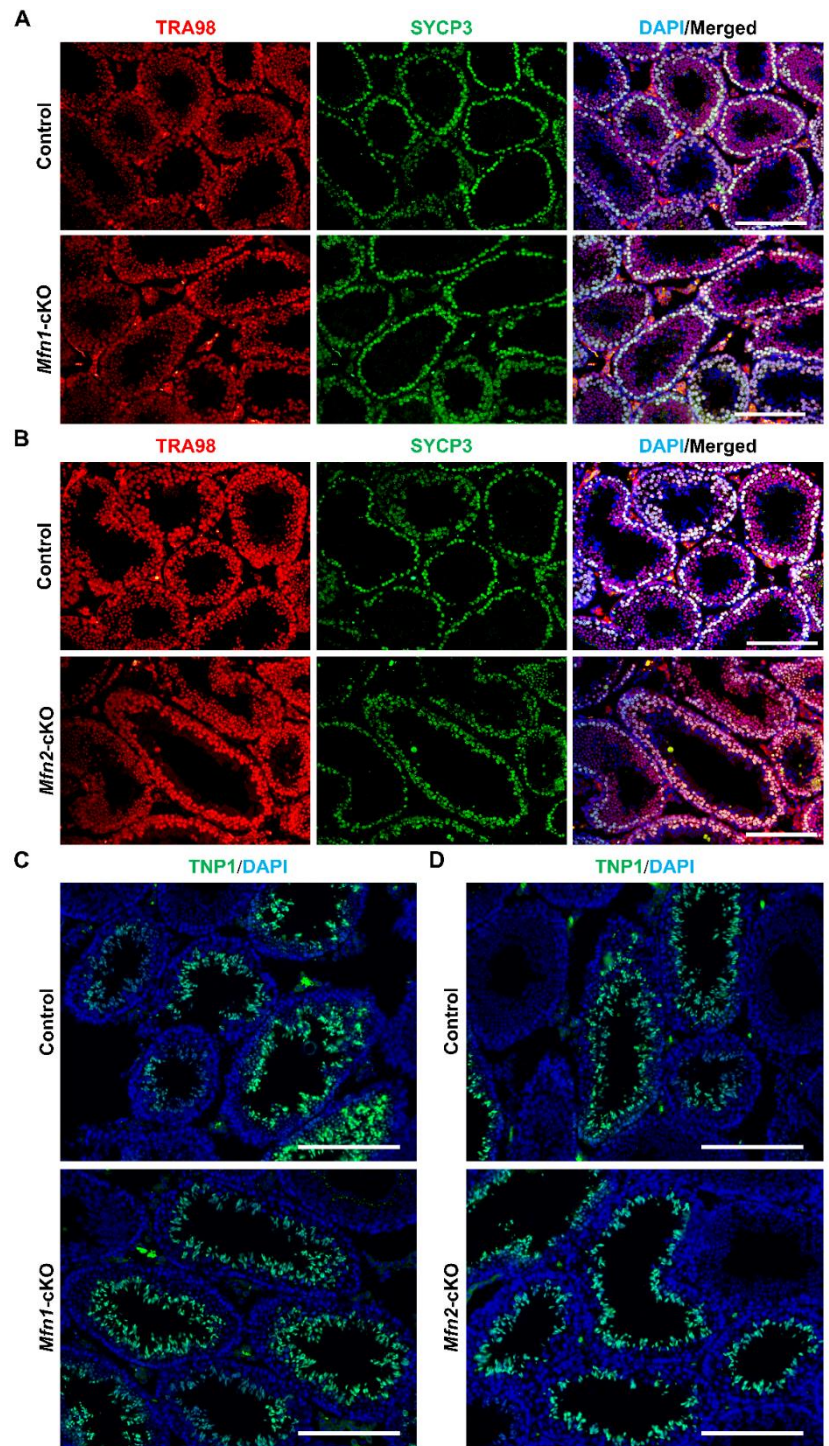

**Figure S1. Either *Mfn1* or *Mfn2* deletion does not affect sperm development.** (A-B) The development of pan-germ cells (indicated by TRA98 staining) and spermatocytes (labeled by SYCP3 staining) was examined by IHF on *Mfn1*-cKO (A) or *Mfn2*-cKO (B) and control testis sections from 6-week mice. Scale bars: 200  $\mu\text{m}$ . (C-D) The elongated spermatids were examined by IHF with a TNP1 antibody, counterstained with DAPI on *Mfn1*-cKO (C) or *Mfn2*-cKO (D) and control testis sections from 6-week mice. Scale bars: 200  $\mu\text{m}$ .

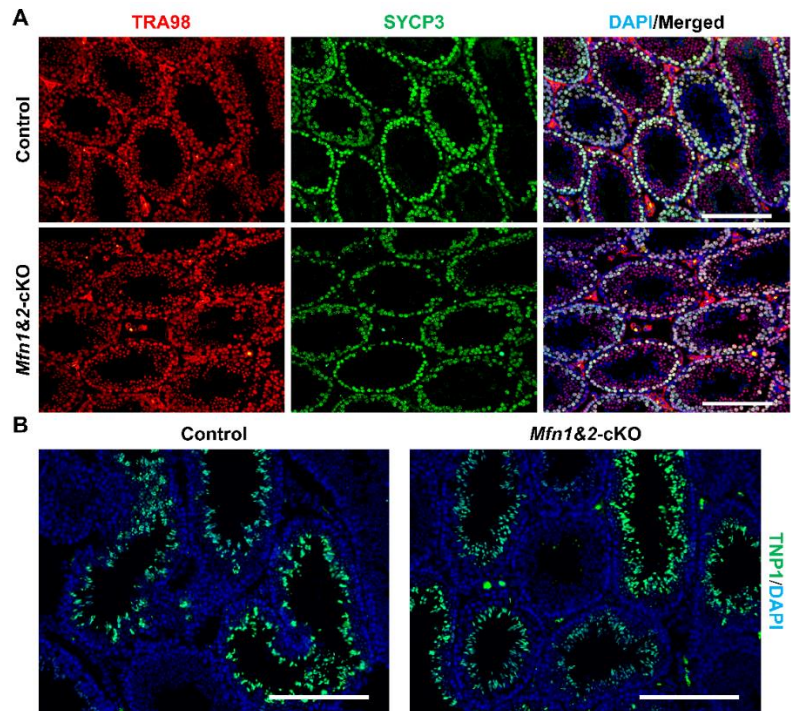

**Figure S2. Combined deletion of *Mfn1* and *Mfn2* in sperm does not affect sperm development.** (A) The development of pan-germ cells (indicated by TRA98 staining) and spermatocytes (labeled by SYCP3 staining) was examined by IHF on *Mfn1&2-cKO* and control testis sections from 6-week mice. (B) The elongated spermatids were examined by IHF with a TNP1 antibody, counterstained with DAPI on *Mfn1&2-cKO* and control testis sections from 6-week mice. (A-B) Scale bars: 200  $\mu$ m.

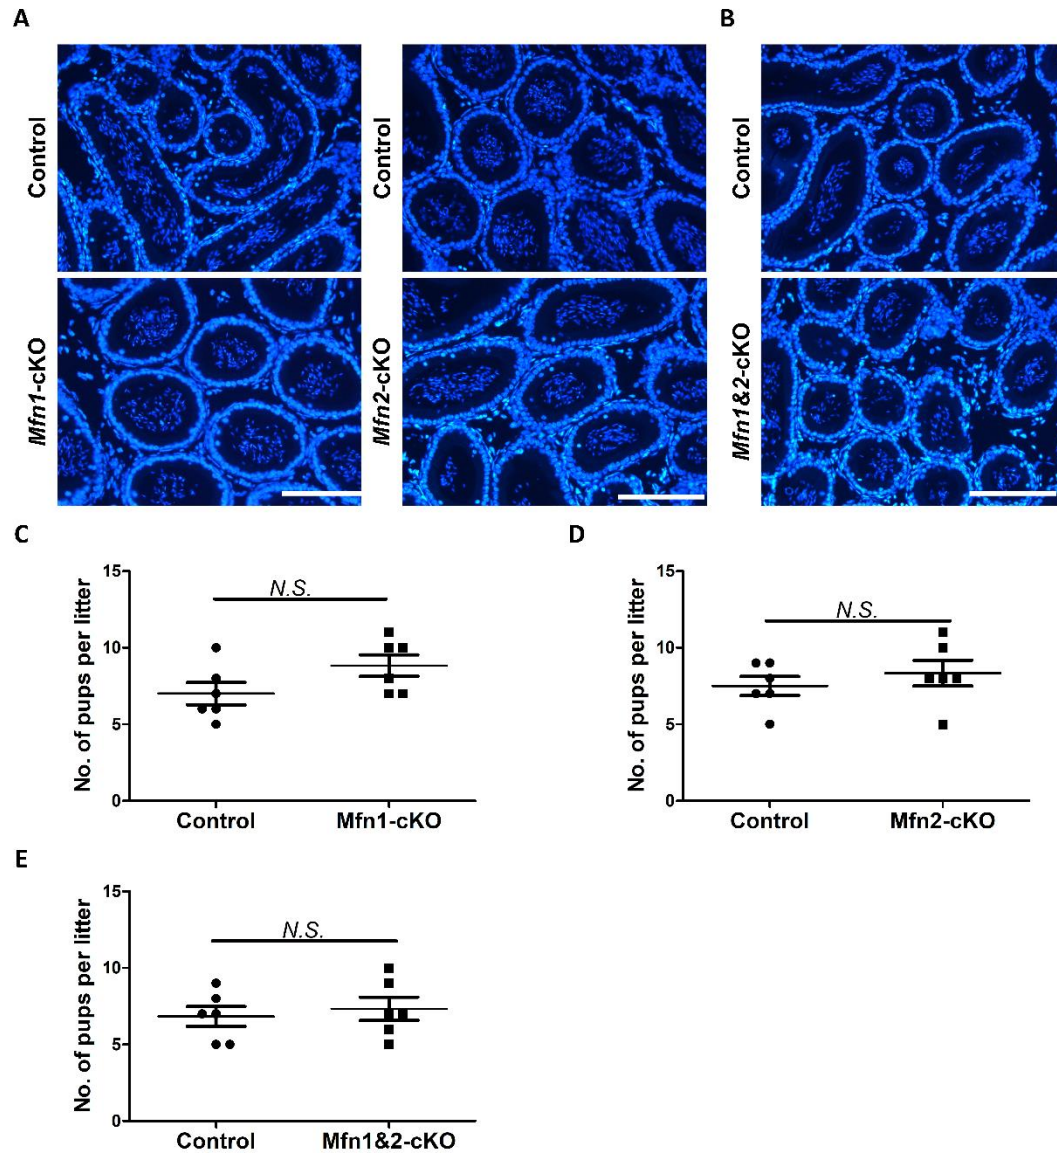

**Figure S3.** Partial deletion of *Mfn1* and/or *Mfn2* in sperm by *Prm1-Cre* from Jackson lab does not affect sperm development and male fertility. (A) DAPI staining in epididymides from control and *Mfn1*-cKO mice at 14-week. (B) DAPI stained sections of epididymides from control and *Mfn1&2*-cKO mice at 8-week, (A–B) Scale bars, 200  $\mu$ m. (C) Averaged pup numbers per litter were calculated based on 6 litters from 3 control and 3 *Mfn1*-cKO male mice. Each male was separately bred with 2 wildtype females for at least 2 months. (D) Averaged pup numbers per litter were calculated based on 6 litters from 3 control and 3 *Mfn2*-cKO male mice. Each male was crossed with 2 wildtype females for over 2 months. (E) Averaged pup numbers per litter were calculated based on 6 litters from 3 control and 3 *Mfn1&2*-cKO male mice. Each male was bred with 2 wildtype females for at least 2 months. (C–E) Data are presented as mean  $\pm$  SEM. N.S.: no significance.
